# Supplementary material
Source: MDPI journal article supplement (https://www.mdpi.com/2073-4395/12/1/179)
Supplement: s1 [file s1]

Table S1: Primer used for the cloning of genes and molecular analysis of transformants

| <b>Primer Name</b>                    | <b>Sequence (5'-3')</b>     |
|---------------------------------------|-----------------------------|
| M13_F                                 | TGTAAAACGACGGCCAGT          |
| M13_R                                 | CAGGAAACAGCTATGACCATG       |
| OsLip1_sgRNA_F                        | GGCA CAGCTTGATGTAGGTTATCC   |
| OsLip1_sgRNA_R                        | AAAC GGATAACCTACATCAAGCTG   |
| Cas9_F                                | CCAGACGGAAGAACCGGATCTG      |
| Cas9_R                                | GATGCTGCCGTTGTCTGAAGGTC     |
| OsLip1-specific PCR F                 | GGCTTTTGTGGAGTCGCCCC        |
| OsLip1-specific PCR R                 | GCATCGTTCTGTGCCCTTGACC      |
| OsLip1-specific Sequencing F          | AGGCACACAAGAACACAG          |
| GolS_F (Gateway cloning)              | CACCATGGCTCCTCCCCAGCTTGCCGG |
| GolS_R (Gateway cloning)              | CGCGGCCGATGGCGCCGTGAC       |
| GolS_SQ_F (Semi-quantitative RT-PCR)  | CATCTCCCAGGGCTGCATCGTC      |
| GolS_SQ_F (Semi- quantitative RT-PCR) | GTCGGCCACGCCACCTTGTC        |
| OsUBQ_F                               | CTTCGTGAAGACCCTGACGGGGA     |
| OsUBQ_R                               | TCCTTCCTTACTTCCGCCCCCA      |
